# Supplementary material for: Functional analysis of the global repressor Tup1 for maltose metabolism in Saccharomyces cerevisiae: different roles of the functional domains
Source: PubMed Central journal article supplement (PMC5679332; doi:10.1186/s12934-017-0806-6), 2017-11-09
Supplement: 12934_2017_806_MOESM1_ESM.pdf [file 12934_2017_806_MOESM1_ESM.pdf]

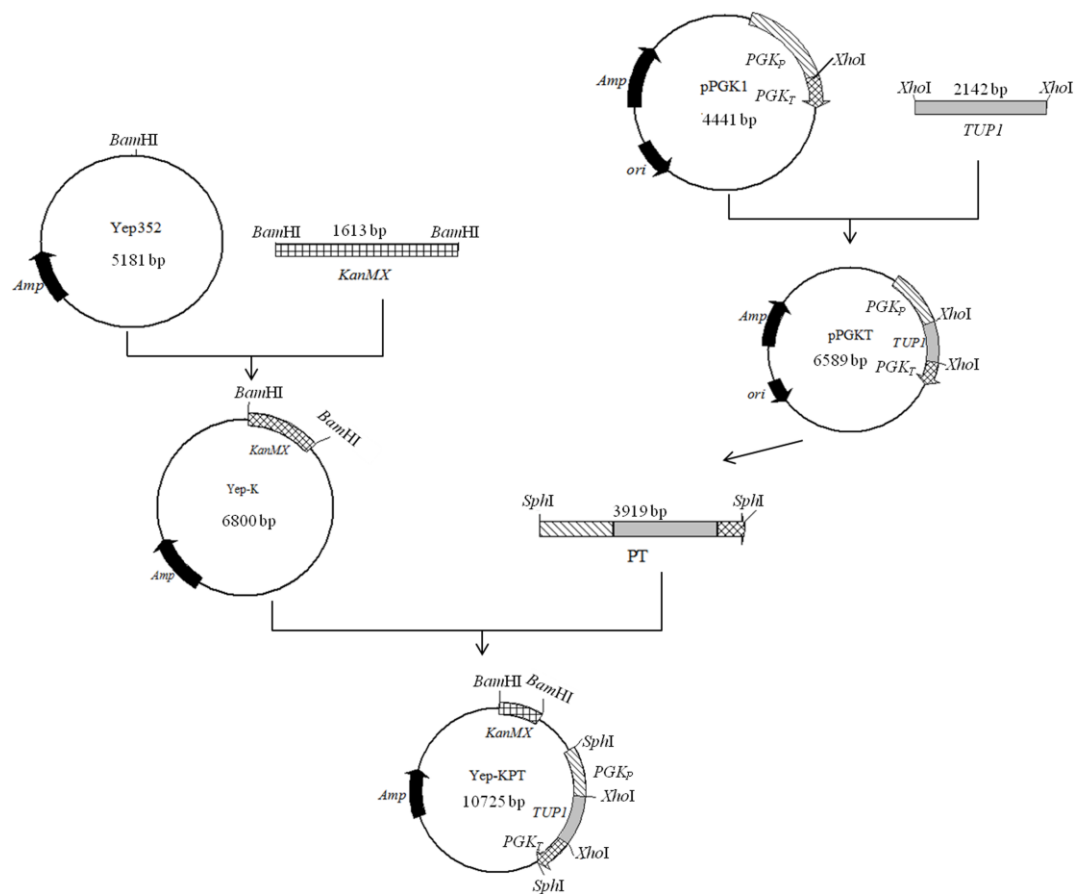

Fig. S1 Construction process of the plasmid Yep-KPT.
