# Supplementary material for: Functional analysis of the global repressor Tup1 for maltose metabolism in Saccharomyces cerevisiae: different roles of the functional domains
Source: PubMed Central journal article supplement (PMC5679332; doi:10.1186/s12934-017-0806-6), 2017-11-09
Supplement: 12934_2017_806_MOESM2_ESM.pdf [file 12934_2017_806_MOESM2_ESM.pdf]

The sequence of plasmid Yep-KPT (Yep-KanMX-PGK1-TUP1) is as followed (Restriction sites are underlined. *KanMX* sequence is in green. The sequence of *PGK1* promoter is in blue. *TUP1* sequence is in pink. The sequence of *PGK1* terminator is in orange):

```

1   ATGACCATGA TTACGAATTC GAGCTCGGTA CCCGGGGATC CCAGCTGAAG CTTCGTACGC
61  TGCAGGTCGA CAACCCTTAA TATAACTTCG TATAATGTAT GCTATACGAA GTTATTAGGT
121 CTAGAGATCT GTTTAGCTTG CCTCGTCCCC GCCGGGTCAC CCGGCCAGCG ACATGGAGGC
181 CCAGAATACC CTCCTTGACA GTCTTGACGT GCGCAGCTCA GGGGCATGAT GTGACTGTCTG
241 CCCGTACATT TAGCCATAC ATCCCCATGT ATAATCATTT GCATCCATAC ATTTTGATGG
301 CCGCACGGCG CGAAGCAAAA ATTACGGCTC CTGCTGCAG ACCTGCGAGC AGGGAAACGC
361 TCCCCTCACA GACGCGTTGA ATTGTCCTCA CGCCGCGCCC CTGTAGAGAA ATATAAAAGG
421 TTAGGATTTG CCACTGAGGT TCTTCTTTCA TATACTTCTT TTTAAAATCT TGCTAGGATA
481 CAGTTCTCAC ATCACATCCG AACATAAACA ACCATGGGTA AGGAAAAGAC TCACGTTTTCG
541 AGGCCGCGAT TAAATTCCAA CATGGATGCT GATTTATATG GGTATAAATG GGCTCGCGAT
601 AATGTCGGGC AATCAGGTGC GACAATCTAT CGATTGTATG GGAAGCCCGA TGCGCCAGAG
661 TTGTTTCTGA AACATGGCAA AGGTAGCGTT GCCAATGATG TTACAGATGA GATGGTCAGA
721 CTAAACTGGC TGACGGAATT TATGCCTCTT CCGACCATCA AGCATTTTAT CCGTACTCCT
781 GATGATGCAT GGTACTCAC CACTGCGATC CCCGGCAAAA CAGCATTCCA GGTATTAGAA
841 GAATATCCTG ATTCAGGTGA AAATATTGTT GATGCGCTGG CAGTGTTTCT GCGCCGGTTG
901 CATTTCGATC CTGTTTGTA TGTCTCTTT AACAGCGATC GCGTATTTTC TCTCGCTCAG
961 GCGCAATCAC GAATGAATA CGGTTTGGTT GATGCGAGTG ATTTTGATGA CGAGCGTAAT
1021 GGCTGGCCTG TTGAACAAGT CTGGAAGAA ATGCATAAGC TTTTGCCATT CTCACCGGAT
1081 TCAGTCGTCA CTCATGGTGA TTTCTCACTT GATAACCTTA TTTTGTGACG GGGGAAATTA
1141 ATAGGTTGTA TTGATGTTGG ACGAGTCGGA ATCGCAGACC GATACCAGGA TCTTGCCATC
1201 CTATGGAAC GCCTCGGTGA GTTTTCTCCT TCATTACAGA AACGGCTTTT TCAAAAATAT
1261 GGTATTGATA ATCCTGATAT GAATAAATTG CAGTTTCATT TGATGCTCGA TGAGTTTTTC
1321 TAATCAGTAC TGACAATAAA AAGATTCTTG TTTTCAAGAA CTTGTCATTT GTATAGTTTT
1381 TTTATATTGT AGTTGTTCTA TTTTAATCAA ATGTTAGCGT GATTTATATT TTTTTTCGCC
1441 TCGACATCAT CTGCCAGAT GCGAAGTTAA GTGCGCAGAA AGTAATATCA TGCGTCAATC
1501 GTATGTGAAT GCTGGTCGCT AACTGCTGT CGATTGATA CTAACGCCGC CATCCAGTGT
1561 CGAAAACGAG CTCTCGAGAA CCCTAATAT AACTTCGTAT AATGTATGCT ATACGAAGTT
1621 ATTAGGTGAT ATCAGATCCA CTAGTGGCCT ATGCGGATCC TCTAGAGTCG ACCTGCAGGC
1681 ATGCTCTAAC TGATCTATCC AAAACTGAAA ATTACATTCT TGATTAGGTT TATCACAGGC
1741 AAATGTAATT TGTGGTATTT TGCCGTCAA AATCTGTAGA ATTTTCTCAT TGGTCACATT
1801 ACAACCTGAA AATACTTTAT CTACAATCAT ACCATTCTTA TAACATGTCC CCTTAATACT
1861 AGGATCAGGC ATGAACGCAT CACAGACAAA ATCTTCTTGA CAAACGTCAC AATTGATCCC
1921 TCCCACATCC TTATACAAT GACAGGTGTC ATTTTGTGCT CTTATGGGAC GATCCTTATT
1981 ACCGCTTTCA TCCGGTGATA GACC GCCACA GAGGGCAGA GAGCAATCAT CACCTGCAAA
2041 CCCTTCTATA CACTCACATC TACCAGTGTA CGAATTGCAT TCAGAAAAC GTTTGCATTC
2101 AAAAATAGGT AGCATACAAT TAAAACATGG CGGGCATGTA TCATTGCCCT TATCTTGTGC

```

2161 AGTTAGACGC GAATTTTTTCG AAGAAGTACC TTCAAAGAAT GGGGTCTTAT CTTGTTTTGC  
2221 AAGTACCACT GAGCAGGATA ATAATAGAAA TGATAATATA CTATAGTAGA GATAACGTCC  
2281 ATGACTTCCC ATACTGTAAT TGCTTTTAGT TGTGTATTTT TAGTGTGCAA GTTTCTGTAA  
2341 ATCGATTAAT TTTTTTTTCT TTCCTCTTTT TATTAACCTT AATTTTTTATT TTAGATTCCCT  
2401 GACTTCAACT CAAGACGCAC AGATATTATA ACATCTGCAT AATAGGCATT TGCAAGAATT  
2461 ACTCGTGAGT AAGGAAAGAG TGAGGAACTA TCGCATACCT GCATTTAAAG ATGCCGATTT  
2521 GGGCGCGAAT CCTTTATTTT GGCTTCACCC TCATACTATT ATCAGGGCCA GAAAAAGGAA  
2581 GTGTTTCCCT CCTTCTTGAA TTGATGTTAC CCTCATAAAG CACGTGGCCT CTTATCGAGA  
2641 AAGAAATTAC CGTCGCTCGT GATTTGTTTG CAAAAAGAAC AAAACTGAAA AAACCCAGAC  
2701 ACGCTCGACT TCCTGTCTTC CTATTGATTG CAGCTTCCAA TTTTCGTCACA CAACAAGGTC  
2761 CTAGCGACGG CTCACAGGTT TTGTAACAAG CAATCGAAGG TTCTGGAATG GCGGGAAAGG  
2821 GTTTAGTACC ACATGCTATG ATGCCACTG TGATCTCCAG AGCAAAGTTC GTTCGATCGT  
2881 ACTGTTACTC TCTCTCTTTC AAACAGAATT GTCCGAATCG TGTGACAACA ACAGCCTGTT  
2941 CTCACACACT CTTTTCTTCT AACCAAGGGG GTGGTTTAGT TTAGTAGAAC CTCGTGAAAC  
3001 TTACATTTAC ATATATATAA ACTTGCATAA ATTGGTCAAT GCAAGAAATA CATATTTGGT  
3061 CTTTTCTAAT TCGTAGTTTT TCAAGTCTT AGATGCTTTC TTTTTCTCTT TTTTACAGAT  
3121 CATCAAGGAA GTAATTATCT ACTTTTTTACA ACAAATATAA AACAAGATCG GAATTCCAGA  
3181 TCTCCTCGAG ATGACTGCCA GCGTTTCGAA TACGCAGAAT AAGCTGAATG AGCTTCTCGA  
3241 TGCCATCAGA CAGGAGTTTC TCCAAGTCTC ACAAGAGGCA AATACCTACC GTCTTCAAAA  
3301 CAAAAGGAT TACGATTTCA AAATGAACCA GCAGCTGGCT GAGATGCAGC AGATAAGAAA  
3361 CACCGTCTAC GAACTGGAAC TAACTCACAG GAAAATGAAG GACGCGTACG AAGAAGAGAT  
3421 CAAGCACTTG AAAGTAGGGC TGGAGCAAAG AGACCATCAA ATTGCATCTT TGACCGTCCA  
3481 GCAACAGCGG CAACAGCAAC AGCAGCAACA GGTCCAGCAG CATTTACAAC AGCAACAGCA  
3541 GCAGCTAGCC GCTGCATCTG CATCTGTTCC AGTTGCGCAA CAACCACCGG CTACTACTTC  
3601 GGCCACCGCC ACTCCAGCAG CAAACACAAC TACTGGTTCG CCATCGGCCT TCCCAGTACA  
3661 AGCTAGCCGT CCTAATCTGG TTGGCTCACA GTTGCTTACC ACCACTTTGC CTGTGGTGTG  
3721 CTCAAACGCC CAACAACAAC TACCACAACA GCAACTGCAA CAGCAGCAAC TTCAACAACA  
3781 GCAACCACCT CCCAGGTTT CCGTGGCACC ATTGAGTAAC ACAGCCATCA ACGGATCTCC  
3841 TACTTCTAAA GAGACCACTA CTTTACCCTC TGTCAAGGCA CCTGAATCTA CGTTGAAAGA  
3901 AACTGAACCG GAAAATAATA ATACCTCGAA GATAAATGAC ACCGGATCCG CCACCACGGC  
3961 CACCACTACC ACCGCAACTG AAAGTGAAT CAAACCTAAG GAGGAAGACG CCACCCGGC  
4021 TAGTTTGCAC CAGGATCACT ACTTAGTCCC TTATAATCAA AGAGCAAACC ACTCTAAACC  
4081 TATCCACCT TTCCTTTTGG ATCTAGATTC CCAGTCTGTT CCCGATGCTC TGAAGAAGCA  
4141 AACAAATGAT TATTATATTT TATACAACCC GGCCTACCA AGAGAAATTG ACGTTGAGTT  
4201 ACACAAATCT TTGGATCATA CTTAGTGTG TTGTTGCGTG AAGTTCAGTA ACGATGGTGA  
4261 ATACTTAGCC ACAGGCTGCA ACAAACACTAC TCAAGTGAT CGCGTTTCAG ATGTTTCTCT  
4321 GGTGGCCCGT CTATCTGACG ATTCTGCTGC CAATAACCAT CGAAATTCGA TCACTGAAAA  
4381 TAACACCACC ACGTCCACGG ATAACAATAC AATGACAACC ACTACTACCA CCACAATTAC  
4441 TACCACAGCG ATGACTTCGG CAGCAGAATT GGCAAAAGAT GTGGAAAACC TGAACACTTC  
4501 GTCTTCCCA TCATCCGACT TGTATATCCG TTCAGTGTGT TTTTCTCCAG ATGGGAAATT  
4561 TTTGGCAACA GGTGCTGAAG ACAGACTGAT TAGAATTTGG GATATTGAAA ATAGAAAGAT  
4621 TGTTATGATT CTTCAAGGCC ACGAACAAGA TATTTATTCA TTGGACTACT TTCCCTCAGG  
4681 TGACAAATTA GTCTCCGGTT CTGGTGACCG TACCGTTCGT ATTTGGGACT TACGTACAGG  
4741 CCAGTGTTCA TTGACTTTAT CCATTGAAGA TGGTGTTACC ACCGTCGCTG TATCACCAGG

4801 TGATGGTAAA TACATCGCTG CTGGTTCTCT AGATCGTGCT GTGAGAGTTT GGGATTCCGA  
4861 GACCGGATTC TTGGTGAAA GACTAGATTC GGAAAACGAA TCCGGTACAG GCCACAAGGA  
4921 CTCTGTTTAT AGCGTTGTCT TCACTAGAGA TGGACAAAGC GTTGTATCCG GCTCATTAGA  
4981 TAGATCTGTT AAGCTCTGGA ATTTGCAGAA TGCAAACAAC AAGAGCGATT CGAAAACCTCC  
5041 AAATTCCGGC ACTTGTGAAG TTACGTATAT CGGGCATAAA GACTTTGTAT TGTCCGTGGC  
5101 CACCACACAA AATGATGAGT ACATCTTGTC CGGTTCCAAA GATCGTGGTG TCCTGTTTTG  
5161 GGATAAGAAA TCCGGCAATC CGTTATTGAT GTTGAAGGT CATAGGAATT CAGTTATATC  
5221 TGTGGCTGTG GCAAACGGGT CTCCGCTGGG TCCAGAATAT AACGTTTTTG CTACTGGTAG  
5281 CGGTGATTGT AAAGCAAGGA TTTGGAAGTA TAAAAAATA GCGCCAAATT AACTCGAGGG  
5341 ATCTGCGATA GATCAATTTT TTTCTTTTCT CTTTCCCAT CTTTACGCT AAAATAATAG  
5401 TTTATTTTAT TTTTTGAATA TTTTTATTT ATATACGTAT ATATAGACTA TTATTTATCT  
5461 TTTAATGATT ATTAAGATTT TTATTAATAA AAAATTTCGT CCTCTTTTAA TGCCTTTATG  
5521 CAGTTTTTTT TTCCCATTCG ATATTTCTAT GTTCGGGTTT AGCGTATTTT AAGTTAATA  
5581 ACTCGAAAT TCTGCGTTCG TTAGCATGCA AGCTTGGCAC TGGCCGTCGT TTTACAACGT  
5641 CGTGACTGGG AAAACCCCTGG CGTTACCCAA CTTAATCGCC TTGCAGCACA TCCCCCTTC  
5701 GCCAGCTGGC GTAATAGCGA AGAGGCCCGC ACCGATCGCC CTTCCCAACA GTTGCGCAGC  
5761 CTGAATGGCG AATGGCGCCT GATGCGGTAT TTTCTCCTTA CGCATCTGTG CGGTATTTCA  
5821 CACCGCATAG GGTAATAACT GATATAATTA AATTGAAGCT CTAATTTGTG AGTTTAGTAT  
5881 ACATGCATTT ACTTATAATA CAGTTTTTTA GTTTTGCTGG CCGCATCTTC TCAAATATGC  
5941 TTCCCAGCCT GCTTTTCTGT AACGTTACCC CTCTACCTTA GCATCCCTTC CCTTTGCAA  
6001 TAGTCCTCTT CCAACAATAA TAATGTCAGA TCCTGTAGAG ACCACATCAT CCACGGTTCT  
6061 ATACTGTTGA CCAATGCGT CTCCCTTGTC ATCTAAACCC ACACCGGGTG TCATAATCAA  
6121 CCAATCGTAA CCTTCATCTC TTCCACCCAT GTCTCTTTGA GCAATAAAGC CGATAACAAA  
6181 ATCTTTGTCG CTCTTCGCAA TGTCAACAGT ACCCTTAGTA TATTCTCCAG TAGATAGGGA  
6241 GCCCTTGCAT GACAATTCTG CTAACATCAA AAGGCCTCTA GGTTCCTTTG TTACTTCTTC  
6301 TGCCGCTGC TTCAAACCGC TAACAATACC TGGGCCACC ACACCGTGTG CATTGTAAT  
6361 GTCTGCCCAT TCTGCTATTC TGTATACACC CGCAGAGTAC TGCAATTTGA CTGTATTACC  
6421 AATGTCAGCA AATTTTCTGT CTTCGAAGAG TAAAAAATTG TACTTGGCGG ATAATGCCTT  
6481 TAGCGGCTTA ACTGTGCCCT CCATGGAAAA ATCAGTCAAG ATATCCACAT GTGTTTTTAG  
6541 TAAACAAATT TTGGGACCTA ATGCTTCAAC TAACTCCAGT AATTCCTTGG TGGTACGAAC  
6601 ATCCAATGAA GCACACAAGT TTGTTTGCTT TTCGTGCATG ATATTAAATA GCTTGGCAGC  
6661 AACAGGACTA GGATGAGTAG CAGCACGTTT CTTATATGTA GCTTTCGACA TGATTTATCT  
6721 TCGTTTCGGT TTTTGTTCG TGCAGTTGGG TTAAGAATAC TGGGCAATTT CATGTTTCTT  
6781 CAACACTACA TATGCGTATA TATACCAATC TAAGTCTGTG CTCCTTCCTT CGTTCTTCCT  
6841 TCTGTTCCGA GATTACCGAA TCAAAAAAAT TTCAAAGAAA CCGAAATCAA AAAAAAGAAT  
6901 AAAAAAAAAA TGATGAATTG AAAAGCTCTT GTTACCCATC ATTGAATTTT GAACATCCGA  
6961 ACCTGGGAGT TTTCCCTGAA ACAGATAGTA TATTTGAACC TGTATAATAA TATATAGTCT  
7021 AGCGCTTTAC GGAAGACAAT GTATGTATTT CGGTTCTTGG AGAAACTATT GCATCTATTG  
7081 CATAGGTAAT CTTGCACGTC GCATCCCCGG TTCATTTTCT GCGTTTCCAT CTTGCACTTC  
7141 AATAGCATAT CTTTGTTAAC GAAGCATCTG TGCTTCATTT TGTAGAACAA AAATGCAACG  
7201 CGAGAGCGCT AATTTTTCAA ACAAAGAATC TGAGCTGCAT TTTTACAGAA CAGAAATGCA  
7261 ACGCGAAAGC GCTATTTTAC CAACGAAGAA TCTGTGCTTC ATTTTTGTAA AACAAAAATG  
7321 CAACGCGAGA GCGCTAATTT TTCAAACAAA GAATCTGAGC TGCATTTTTA CAGAACAGAA  
7381 ATGCAACGCG AGAGCGCTAT TTTACCAACA AAGAATCTAT ACTTCTTTTT TGTTCTACAA

7441 AAATGCATCC CGAGAGCGCT ATTTTTCTAA CAAAGCATCT TAGATTACTT TTTTTCTCCT  
7501 TTGTGCGCTC TATAATGCAG TCTCTTGATA ACTTTTTGCA CTGTAGGTCC GTTAAGGTTA  
7561 GAAGAAGGCT ACTTTGGTGT CTATTTTCTC TTCCATAAAA AAAGCCTGAC TCCACTTCCC  
7621 GCGTTTACTG ATTACTAGCG AAGCTGCGGG TGCATTTTTT CAAGATAAAG GCATCCCCGA  
7681 TTATATTCTA TACCGATGTG GATTGCGCAT ACTTTGTGAA CAGAAAGTGA TAGCGTTGAT  
7741 GATTCTTCAT TGGTCAGAAA ATTATGAACG GTTTCTTCTA TTTTGTCTCT ATATACTACG  
7801 TATAGGAAAT GTTTACATTT TCGTATTGTT TTCGATTCAC TCTATGAATA GTTCTTACTA  
7861 CAATTTTTTT GTCTAAAGAG TAATACTAGA GATAAACATA AAAAATGTAG AGGTTCGAGTT  
7921 TAGATGCAAG TTCAAGGAGC GAAAAGTGGA TGGGTAGGTT ATATAGGGAT ATAGCACAGA  
7981 GATATATAGC AAAGAGATAC TTTTGAGCAA TGTTTGTGGA AGCGGTATTC GCAATATTTT  
8041 AGTAGCTCGT TACAGTCCGG TCGTTTTTTG GTTTTTTGAA AGTGCGTCTT CAGAGCGCTT  
8101 TTGGTTTTCA AAAGCGCTCT GAAGTTCCTA TACTTTCTAG CTAGAGAATA GGAACTTCGG  
8161 AATAGGAACT TCAAAGCGTT TCCGAAAACG AGCGCTTCCG AAAATGCAAC GCGAGCTGCG  
8221 CACATACAGC TCACTGTTCA CGTCGCACCT ATATCTGCGT GTTGCCTGTA TATATATATA  
8281 CATGAGAAGA ACGGCATAGT GCGTGTTTAT GCTTAAATGC GTTATGGTGC ACTCTCAGTA  
8341 CAATCTGCTC TGATGCCGCA TAGTTAAGCC AGCCCCGACA CCCGCCAACA CCCGCTGACG  
8401 CGCCCTGACG GGCTTGTCTG CTCCCGGCAT CCGCTTACAG ACAAGCTGTG ACCGTCTCCG  
8461 GGAGCTGCAT GTGTCAGAGG TTTTCACCGT CATCACCGAA ACGCGCGAGA CGAAAGGGCC  
8521 TCGTGATACG CCTATTTTTA TAGGTTAATG TCATGATAAT AATGGTTTTCT TAGACGTCAG  
8581 GTGGCACTTT TCGGGGAAAT GTGCGCGGAA CCCCTATTTG TTTATTTTTT TAAATACATT  
8641 CAAATATGTA TCCGCTCATG AGACAATAAC CCTGATAAAT GCTTCAATAA TATTGAAAAA  
8701 GGAAGAGTAT GAGTATTCAA CATTTCCGTG TCGCCCTTAT TCCCTTTTTT GCGGCATTTT  
8761 GCCTTCTGT TTTTGCTCAC CCAGAAAACG TGGTGAAAGT AAAAGATGCT GAAGATCAGT  
8821 TGGGTGCACG AGTGGGTAC ATCGAACTGG ATCTCAACAG CGGTAAGATC CTTGAGAGTT  
8881 TTCGCCCCGA AGAACGTTTT CCAATGATGA GCACTTTTAA AGTTCTGCTA TGTGGCGCGG  
8941 TATTATCCCG TATTGACGCC GGGCAAGAGC AACTCGGTCG CCGCATAAC TATTCTCAGA  
9001 ATGACTTGGT TGAGTACTCA CCAGTCACAG AAAAGCATCT TACGGATGGC ATGACAGTAA  
9061 GAGAATTATG CAGTGCTGCC ATAACCATGA GTGATAACAC TGCGGCCAAC TTACTTCTGA  
9121 CAACGATCGG AGGACCGAAG GAGCTAACCG CTTTTTTGCA CAACATGGGG GATCATGTAA  
9181 CTCGCCTTGA TCGTTGGGAA CCGGAGCTGA ATGAAGCCAT ACCAAACGAC GAGCGTGACA  
9241 CCACGATGCC TGTAGCAATG GCAACAACGT TGCGCAAACT ATTAAGTGGC GAACTACTTA  
9301 CTCTAGCTTC CCGGCAACAA TTAATAGACT GGATGGAGGC GGATAAAGTT GCAGGACCAC  
9361 TTCTGCGCTC GGCCCTTCCG GCTGGCTGGT TTATTGCTGA TAAATCTGGA GCCGGTGAGC  
9421 GTGGGTCTCG CGGTATCATT GCAGCACTGG GGCCAGATGG TAAGCCCTCC CGTATCGTAG  
9481 TTATCTACAC GACGGGGAGT CAGGCAACTA TGGATGAACG AAATAGACAG ATCGCTGAGA  
9541 TAGGTGCCTC ACTGATTAAG CATTGGTAAC TGTCAGACCA AGTTTACTCA TATATACTTT  
9601 AGATTGATTT AAAACTTCAT TTTTAATTTA AAAGGATCTA GGTGAAGATC CTTTTTGATA  
9661 ATCTCATGAC CAAAATCCCT TAACGTGAGT TTTTCGTTCCA CTGAGCGTCA GACCCCGTAG  
9721 AAAAGATCAA AGGATCTTCT TGAGATCCTT TTTTTCTGCG CGTAATCTGC TGCTTGCAAA  
9781 CAAAAAACC ACCGCTACCA GCGGTGGTTT GTTTGCCGGA TCAAGAGCTA CCAACTCTTT  
9841 TTCCGAAGGT AACTGGCTTC AGCAGAGCGC AGATACCAA TACTGTCCTT CTAGTGTAGC  
9901 CGTAGTTAGG CCACCACTTC AAGAACTCTG TAGCACCGCC TACATACCTC GCTCTGCTAA  
9961 TCCTGTTACC AGTGGCTGCT GCCAGTGGCG ATAAGTCGTG TCTTACCGGG TTGGACTCAA  
10021 GACGATAGTT ACCGGATAAG GCGCAGCGGT CGGGCTGAAC GGGGGGTTTCG TGCACACAGC

10081 CCAGCTTGGA GCGAACGACC TACACCGAAC TGAGATACCT ACAGCGTGAG CATTGAGAAA  
10141 GCGCCACGCT TCCCGAAGGG AGAAAGGCGG ACAGGTATCC GGTAAGCGGC AGGGTCGGAA  
10201 CAGGAGAGCG CACGAGGGAG CTCACAGGGG GAAACGCCTG GTATCTTTAT AGTCCTGTGC  
10261 GGTTTCGCCA CCTCTGACTT GAGCGTCGAT TTTTGTGATG CTCGTCAGGG GGGCGGAGCC  
10321 TATGGAAAAA CGCCAGCAAC GCGGCCTTTT TACGGTTCCT GGCCTTTTGC TGGCCTTTTG  
10381 CTCACATGTT CTTTCCTGCG TTATCCCCTG ATTCTGTGGA TAACCGTATT ACCGCCTTTG  
10441 AGTGAGCTGA TACCGCTCGC CGCAGCCGAA CGACCGAGCG CAGCGAGTCA GTGAGCGAGG  
10501 AAGCGGAAGA GCGCCCAATA CGCAAACCGC CTCTCCCCGC GCGTTGGCCG ATTCATTAAT  
10561 CCAGCTGGCA CGACAGGTTT CCCGACTGGA AAGCGGGCAG TGAGCGCAAC GCAATTAATG  
10621 TGAGTTACCT CACTCATTAG GCACCCAGG CTTTACACTT TATGCTTCCG GCTCGTATGT  
10681 TGTGTGGAAT TGTGAGCGGA TAACAATTTT ACACAGGAAA CAGCT
