# Supplementary material for: Functional analysis of the global repressor Tup1 for maltose metabolism in Saccharomyces cerevisiae: different roles of the functional domains
Source: PubMed Central journal article supplement (PMC5679332; doi:10.1186/s12934-017-0806-6), 2017-11-09
Supplement: 12934_2017_806_MOESM3_ESM.pdf [file 12934_2017_806_MOESM3_ESM.pdf]

Table S1 Concentration of residual maltose in maltose LSMLD medium (g/L)

| Strains            | Fermentation time (min) |                  |                  |                  |                  |                  |                  |                               |  |
|--------------------|-------------------------|------------------|------------------|------------------|------------------|------------------|------------------|-------------------------------|--|
|                    | 0                       | 30               | 60               | 90               | 120              | 150              | 180              | 240                           |  |
| BY14 $\alpha$      | 37.83 $\pm$ 0.89        | 36.50 $\pm$ 0.78 | 32.33 $\pm$ 0.66 | 28.60 $\pm$ 0.62 | 25.34 $\pm$ 0.45 | 20.05 $\pm$ 0.40 | 13.93 $\pm$ 0.38 | 6.19 $\pm$ 0.26               |  |
| BYK                | 37.86 $\pm$ 0.90        | 36.53 $\pm$ 0.67 | 32.53 $\pm$ 0.54 | 29.02 $\pm$ 0.58 | 25.12 $\pm$ 0.50 | 19.87 $\pm$ 0.44 | 13.76 $\pm$ 0.25 | 6.17 $\pm$ 0.21               |  |
| B+T                | 38.02 $\pm$ 0.78        | 36.28 $\pm$ 0.72 | 32.05 $\pm$ 0.60 | 28.34 $\pm$ 0.51 | 23.92 $\pm$ 0.44 | 19.37 $\pm$ 0.35 | 12.47 $\pm$ 0.30 | 5.68 $\pm$ 0.12 <sup>a</sup>  |  |
| B+T <sub>C</sub>   | 38.00 $\pm$ 0.89        | 36.34 $\pm$ 0.78 | 32.14 $\pm$ 0.64 | 28.46 $\pm$ 0.60 | 25.26 $\pm$ 0.48 | 19.47 $\pm$ 0.41 | 11.76 $\pm$ 0.30 | 5.71 $\pm$ 0.16 <sup>a</sup>  |  |
| B+T <sub>B</sub>   | 37.68 $\pm$ 0.74        | 36.67 $\pm$ 0.70 | 32.45 $\pm$ 0.65 | 28.12 $\pm$ 0.55 | 25.10 $\pm$ 0.50 | 19.86 $\pm$ 0.44 | 13.69 $\pm$ 0.32 | 6.03 $\pm$ 0.26               |  |
| B+T <sub>A</sub>   | 38.12 $\pm$ 0.65        | 36.30 $\pm$ 0.61 | 32.78 $\pm$ 0.60 | 28.83 $\pm$ 0.60 | 25.06 $\pm$ 0.51 | 20.00 $\pm$ 0.50 | 13.40 $\pm$ 0.44 | 5.97 $\pm$ 0.15               |  |
| B+T <sub>D</sub>   | 37.91 $\pm$ 0.78        | 35.51 $\pm$ 0.70 | 33.60 $\pm$ 0.62 | 28.86 $\pm$ 0.60 | 24.99 $\pm$ 0.55 | 20.72 $\pm$ 0.46 | 12.84 $\pm$ 0.40 | 6.18 $\pm$ 0.20               |  |
| B+T <sub>E</sub>   | 38.10 $\pm$ 0.80        | 36.63 $\pm$ 0.74 | 34.17 $\pm$ 0.68 | 28.83 $\pm$ 0.64 | 24.45 $\pm$ 0.58 | 20.19 $\pm$ 0.50 | 14.44 $\pm$ 0.50 | 7.34 $\pm$ 0.30 <sup>a</sup>  |  |
| B-TUP1             | 38.00 $\pm$ 0.92        | 36.69 $\pm$ 0.77 | 32.91 $\pm$ 0.64 | 27.95 $\pm$ 0.58 | 26.00 $\pm$ 0.54 | 20.83 $\pm$ 0.42 | 15.73 $\pm$ 0.40 | 6.88 $\pm$ 0.22 <sup>a</sup>  |  |
| B-T+K              | 38.02 $\pm$ 0.88        | 36.58 $\pm$ 0.72 | 32.65 $\pm$ 0.60 | 28.24 $\pm$ 0.60 | 25.92 $\pm$ 0.44 | 20.37 $\pm$ 0.35 | 15.47 $\pm$ 0.30 | 6.78 $\pm$ 0.18 <sup>a</sup>  |  |
| B-T+T <sub>C</sub> | 38.10 $\pm$ 0.89        | 35.77 $\pm$ 0.75 | 32.07 $\pm$ 0.60 | 27.04 $\pm$ 0.57 | 22.62 $\pm$ 0.40 | 18.31 $\pm$ 0.41 | 12.91 $\pm$ 0.27 | 5.71 $\pm$ 0.16 <sup>ab</sup> |  |
| B-T+T <sub>B</sub> | 38.20 $\pm$ 0.90        | 35.63 $\pm$ 0.70 | 31.87 $\pm$ 0.65 | 26.58 $\pm$ 0.53 | 23.34 $\pm$ 0.50 | 19.49 $\pm$ 0.41 | 12.84 $\pm$ 0.22 | 5.64 $\pm$ 0.19 <sup>ab</sup> |  |
| B-T+T <sub>A</sub> | 37.69 $\pm$ 0.71        | 35.19 $\pm$ 0.63 | 31.29 $\pm$ 0.63 | 27.08 $\pm$ 0.60 | 23.55 $\pm$ 0.55 | 19.21 $\pm$ 0.51 | 12.53 $\pm$ 0.32 | 5.46 $\pm$ 0.15 <sup>ab</sup> |  |
| B-T+T <sub>D</sub> | 38.15 $\pm$ 0.78        | 35.54 $\pm$ 0.72 | 33.17 $\pm$ 0.62 | 28.33 $\pm$ 0.60 | 24.65 $\pm$ 0.48 | 19.69 $\pm$ 0.45 | 14.47 $\pm$ 0.36 | 6.44 $\pm$ 0.21 <sup>b</sup>  |  |
| B-T+T <sub>E</sub> | 37.90 $\pm$ 0.80        | 35.66 $\pm$ 0.74 | 32.71 $\pm$ 0.70 | 28.79 $\pm$ 0.65 | 24.74 $\pm$ 0.55 | 20.88 $\pm$ 0.50 | 14.38 $\pm$ 0.40 | 6.33 $\pm$ 0.20 <sup>b</sup>  |  |

Values shown represent averages of at least three independent experiments (data are means  $\pm$  SD).

<sup>a</sup> Values of the mutants are significantly (Student's *t* test,  $P < 0.05$ ,  $n=3$ ) different from that of the parental strain BY14 $\alpha$ .

<sup>b</sup> Values of the mutants are significantly (Student's *t* test,  $P < 0.05$ ,  $n=3$ ) different from that of the mutant B-TUP1.
